# Supplementary material for: Comparative Transcriptomics in Atlantic Salmon Head Kidney and SHK-1 Cell Line Exposed to the Sea Louse Cr-Cathepsin
Source: Genes (Basel). 2023 Apr 13;14(4):905. doi: 10.3390/genes14040905 (PMC10138087; doi:10.3390/genes14040905)
Supplement: Supplementary file 1 [file genes-14-00905-s001.zip › Supplementary tables.xlsx]

## Sheet: Table S1
Table S1: Contig clusters annotation and TPM values for SHK-1 cell lin and salmon HK transcriptome
Cluster 1: SHK-1 cells upregulated
Contigs	ID	Annotation	TPM_SHK1
contig_45105	A0A1S3KVV1	nuclear factor of activated T-cells cytoplasmic 3-like isoform X2	13052.3
contig_595	A0A1S3LHE4	14-3-3 protein beta/alpha-2	6878.38
contig_32871	A0A1S3R700	cell wall protein IFF6-like	6303.02
contig_7802	B5X4D7	SPARC	5639.77
contig_35321	A0A1S3LQB1	Ceramide transfer protein	5615.68
contig_5397	B5X265	Ran-specific GTPase-activating protein	5513.87
contig_4700	A0A1S3MAZ2	Integrator complex subunit 9	5427.8
contig_11504	B9ELV5	ADP-ribosylation factor 4	4847.76
contig_25955	A0A1S3PBH2	GCS light chain	4412.57
contig_447	A0A1S3KU98	Diacylglycerol kinase	4083.66
contig_2248	A0A1S3SZ07	calpain small subunit 1-like	3667.06
contig_3375	C0H8S4	Dol-P-Man:Man(5)GlcNAc(2)-PP-Dol alpha-1,3-mannosyltransferase	3586.83
contig_13098	B5XEB2	Heat shock factor-binding protein 1	3358.29
contig_11438	A0A1S3RTP8	ensconsin-like isoform X6	3348.72
contig_18802	B5X2N8	AP-2 complex subunit mu-1	3279.17
contig_12853	A0A1S3SZ77	Biogenesis of lysosome-related organelles complex 1 subunit 3	2999.65
contig_11404	B5X2F4	Methionine aminopeptidase 2	2963.01
contig_1510	A0A1S3PG11	Lipid phosphate phosphohydrolase 1	2855.85
contig_26272	B5X895	Cytochrome c oxidase subunit 4	2851.42
contig_6232	B5X427	Calponin	2823.06
contig_22866	B5X3Q2	Gamma-glutamylcyclotransferase	2806.87
contig_7475	A0A1S3KW11	Carboxypeptidase	2726.22
contig_7075	B5X3T6	Lysosomal-associated transmembrane protein 4A	2548.18
contig_6277	A0A1S3LPP6	14-3-3 protein epsilon-like isoform X3	2424.67
contig_11138	B5X0Q1	Ras-related protein Rab-5C	2393.72
contig_5449	A0A1S3LTS7	uncharacterized protein LOC106568450	2304.67
contig_17224	B5X2B1	Histone-binding protein RBBP4	2264.75
contig_15813	B5RI48	Uncharacterized protein (Fragment)	2261.04
contig_6304	A0A1S3SXL9	serine/threonine-protein phosphatase 2A 65 kDa regulatory subunit A beta isoform	2250.34
contig_53842	B5XD67	Heat shock protein beta-7	2230.14
contig_51676	A0A1S3MKA1	IMP2-like protein	2137.12
contig_27980	A0A1S3SF42	bromodomain-containing protein 1-like	2061.63
contig_15309	B5X2T3	Aldehyde dehydrogenase, mitochondrial	2059.68
contig_6195	A0A1S3S9N0	Sorting nexin	1956.53
contig_17128	A0A1S3SX93	Amino acid transporter	1933.2
contig_3716	B5X9T8	Myosin light polypeptide 6	1821.71
contig_10931	A0A1S3QZV6	hypoxia-inducible factor 1-alpha isoform X2	1774.96
contig_23066	B5X395	transcription initiation factor TFIID subunit 7	1767.49
contig_9831	B5DGS4	Malate dehydrogenase	1757.23
contig_15063	B5X7N5	Cathepsin H	1640.17
contig_2386	C0HBQ6	Transposable element Tcb1 transposase	1616.22
contig_8858	B5XCQ8	Oleoyl-[acyl-carrier-protein] hydrolase	1612.52
contig_4610	A0A1S3R7J9	2',3'-cyclic-nucleotide 3'-phosphodiesterase	1560.58
contig_45250	A0A1S3R9L1	Glucosidase 2 subunit beta	1557.78
contig_12491	A0A1S3SQZ7	nesprin-3-like	1501.11
contig_49738	A0A1S3L2K8	uncharacterized protein LOC106563597	1477.56
contig_28542	A0A1S3MCD4	osteopetrosis-associated transmembrane protein 1-like isoform X2	1467.61
contig_30396	B5DFW1	Cytochrome C	1466.95
contig_36641	A0A1S3MDP3	Piezo-type mechanosensitive ion channel component	1448.07
contig_2626	A0A1S3P3A3	Dolichyl-diphosphooligosaccharide--protein glycosyltransferase subunit 1	1444.03
contig_6283	B9EPG1	Thioredoxin	1388.86
contig_13081	B5XEU9	Histone RNA hairpin-binding protein	1381.77
contig_18783	B5X1M9	Probable serine carboxypeptidase CPVL	1375.55
contig_6636	A0A1S3RQQ6	LOW QUALITY PROTEIN: neuroblast differentiation-associated protein AHNAK-like	1369.19
contig_55260	A0A1S3NWU8	Peptidylprolyl isomerase	1344.96
contig_6386	A8C5I2	Transposase	1342.5
contig_9008	A0A1S3KWN3	ras GTPase-activating-like protein IQGAP1	1335.84
contig_50225	A0A1S3SPW8	latent-transforming growth factor beta-binding protein 2-like isoform X1	1323.13
contig_14773	B5X4N6	G1/S-specific cyclin-D2	1316.61
contig_1361	A0A1S3KXA1	spectrin alpha chain, non-erythrocytic 1-like isoform X4	1269.33
contig_6179	A0A1S3PX04	Protein disulfide-isomerase	1265.5
contig_3721	A0A1S3NQJ2	lamin-A-like	1262.06
contig_14139	A0A1S3MWE2	basic leucine zipper and W2 domain-containing protein 1-A	1260.48
contig_17721	A0A1S3N5V9	Ornithine--oxo-acid aminotransferase	1256.64
contig_14247	C0H980	Lysosome-associated membrane glycoprotein 1	1224.75
contig_288	B5XDP1	60S acidic ribosomal protein P0	1217.37
contig_18123	A0A1S3QWX1	endoplasmic reticulum resident protein 44-like	1215.66
contig_8343	A0A1S3PYE2	tumor necrosis factor alpha-induced protein 8-like protein 2	1207.1
contig_8128	A0A1S3L9H1	Thioredoxin-disulfide reductase	1180.73
contig_7258	B5X693	Ependymin	1173.16
contig_6675	A0A1S3KVN9	lysophosphatidylcholine acyltransferase 2-like	1135.71
contig_12674	A0A1S3MK85	F-box/LRR-repeat protein 14-like	1130.18
contig_1816	A0A1S3RS37	atlastin-3-like	1066.85
contig_2427	A0A1S3LEZ4	Transporter	1036.7
contig_26620	A0A1S3PY05	uncharacterized protein LOC106588274	1028.12
contig_53751	A0A1S3LDM1	type-1 angiotensin II receptor-associated protein isoform X3	1026.72
contig_8845	A0A1S3PSZ4	disintegrin and metalloproteinase domain-containing protein 9 isoform X2	1017.08
contig_1452	A0A1S3LAU1	LIM domain and actin-binding protein 1-like isoform X1	1011.42
contig_15910	A0A1S3MR20	Amyloid-beta A4 protein	973.803
contig_7566	A0A1S3NZN6	60 kDa chaperonin	967.472
contig_117209	B5X5X9	Gastrulation-specific protein G12	950.02
contig_20252	C0HAX9	Cyclic AMP-dependent transcription factor ATF-3	932.306
contig_41936	B5X437	Solute carrier family 35 member B1	928.759
contig_10145	A0A1S3L974	glutaredoxin-1-like	925.757
contig_10492	C0HAQ6	Elongation factor 2	913.42
contig_26255	A0A1S3T220	Phosphatidylinositol-4,5-bisphosphate 3-kinase	905.813
contig_28894	A0A1S3R2R8	cadherin-6-like	904.917
contig_1604	B5XB14	Cleavage and polyadenylation specificity factor subunit 5	881.154
contig_17236	A0A1S3RN55	beta-glucuronidase-like	872.404
contig_39596	B5X4I1	ADRM1	865.114
contig_4494	B5XE99	Transmembrane emp24 domain-containing protein 10	856.185
contig_1256	C0H8V3	Pyruvate kinase	854.608
contig_22030	A0A1S3PUS9	coatomer subunit beta-like	850.041
contig_12018	A0A1S3KQY7	Caveolin	846.391
contig_37824	A0A1S3NTG6	Collagen-binding protein	836.377
contig_90990	A0A1S3RSG3	Tetraspanin	835.263
contig_38494	A0A1S3KVX5	Tetraspanin	817.017
contig_10935	A0A1S3PWQ5	uncharacterized protein L	800.692
contig_2049	A0A1S3RV14	casein kinase I isoform alpha isoform X6	786.47
contig_24650	A0A1S3M3C2	tropomyosin alpha-3 chain isoform X9	774.387
Cluster 2: HK upregulated
Contigs	ID	Annotation	TPM_HK
contig_40	B5X746	Hemoglobin subunit alpha-4	61426.2
contig_230	C0H824	Hemoglobin subunit beta-1	21155.3
contig_65	C0H8L6	Hemoglobin subunit alpha	17630.2
contig_30	B5X8L0	Hemoglobin subunit beta	16496.9
contig_37	C0H897	Cytochrome c oxidase polypeptide Vb	12515.4
contig_127	C0H824	Hemoglobin subunit beta-1	8517.23
contig_92	B5XE30	Hemoglobin subunit alpha	4094.32
contig_22	E2JDK0	Cytochrome c oxidase subunit 1	3858.94
contig_117	Q85Q94	Cytochrome b (Fragment)	3541.95
contig_483	B5X7S6	Metalloendopeptidase	2592.43
contig_1790	B5DGI5	60S ribosomal protein L12	2570.94
contig_426	B9EL80	Non-histone chromosomal protein H6	2121.68
contig_114	Q91990	Alpha-globin (Fragment)	1891.2
contig_547	A0A1S3SBV8	40S ribosomal protein S24	1874.36
contig_1318	A0A1S3PV20	thrombospondin type-1 domain-containing protein 4-like	1813.35
contig_1221	C0H7E7	40S ribosomal protein S14	1764.36
contig_1162	A0A1S3R037	golgin subfamily A member 6-like protein 22	1724.59
contig_441	B9EL80	Non-histone chromosomal protein H6	1645.37
contig_2296	A0A1S3S2I3	uncharacterized protein LOC106606767	1609.7
contig_283	B5X7J4	60S ribosomal protein L3	1571.71
contig_2120	B5X6U7	60S ribosomal protein L27a	1548.4
contig_388	B5X4P7	Collagenase 3	1544.6
contig_448	E0R869	40S ribosomal protein S3a	1536.22
contig_797	B5DG02	60S ribosomal protein L9	1386.49
contig_269	B5DGW4	60S ribosomal protein L7	1343.92
contig_422	B5DGC4	Ribosomal protein L4-b	1313.82
contig_1172	C0H7D2	60S ribosomal protein L35a	1312.68
contig_271	C0H748	60S ribosomal protein L8	1307.03
contig_1047	A0A1S3RZT9	40S ribosomal protein S27	1288.68
contig_51	B5X748	60S ribosomal protein L24	1268.26
contig_1171	C0H7D2	60S ribosomal protein L35a	1249.3
contig_1563	B5DGQ9	Ferritin	1206.8
contig_6757	A0A1S3KUQ4	probable C-mannosyltransferase DPY19L3 isoform X4	1135.95
contig_8156	A0A1S3QKU9	dedicator of cytokinesis protein 1-like	1132.55
contig_1309	B9ELE8	Ubiquitin carboxyl extension protein 80	1119.62
contig_156	A0A1S3KZA2	eosinophil peroxidase	1094.2
contig_841	B5XCY0	60S ribosomal protein L18	1079.1
contig_3203	B5X6X8	40S ribosomal protein S24	1063.7
contig_436	B5DGH0	60S ribosomal protein L5	954.347
contig_839	M4V3H0	40S ribosomal protein S4	948.955
contig_323	A0A1S3PYI6	uncharacterized protein LOC106588115	890.241
contig_143	B5XH65	H-2 class II histocompatibility antigen gamma chain	889.016
contig_1428	B5DGK7	40S ribosomal protein S8	850.385
contig_956	C0H7I9	40S ribosomal protein S15	833.9
contig_4718	B5XCM6	Nicotinamide riboside kinase 2	825.081
contig_2198	A0A1S3NHN7	60S ribosomal protein L21	818.553
contig_3491	A0A1S3KTN8	adhesion G-protein coupled receptor G5-like	812.433
contig_123	B5X1I2	Natterin-like protein	807.835
contig_1435	B5XB84	Cofilin-2	796.615
contig_1879	C0H7R2	Ribosomal protein L37	790.829
contig_632	B5DGV3	Ribosomal protein L15	782.826
contig_34322	A0A1S3MTY7	protein-lysine methyltransferase METTL21E-like	780.142
contig_5491	A0A1S3MYF8	cytochrome b-245 heavy chain-like	755.545
contig_2437	M4V3H3	60S ribosomal protein L27a	749.178
contig_82	A0A1S3PY36	uncharacterized protein LOC106588302	723.846
contig_949	B5X4C7	92 kDa gelatinase	712.154
contig_634	C0PUF0	Anion exchange protein (Fragment)	701.801
contig_633	C0PUF0	Anion exchange protein (Fragment)	697.909
contig_1380	A0A1S3PW39	Transaldolase	688.604
contig_2309	A0A1S3QSP3	40S ribosomal protein S8	686.91
contig_1344	B5DGI1	60S ribosomal protein L28	680.233
contig_2183	B5XA03	40S ribosomal protein S28	677.19
contig_73	A0A1S3MEA3	5-aminolevulinate synthase	675.973
contig_2184	B5XA03	40S ribosomal protein S28	669.793
contig_103	B9EQ96	HLA class II histocompatibility antigen gamma chain	664.115
contig_2478	A0A1S3QLG9	Polyadenylate-binding protein	662.136
contig_3312	A0A1S3N251	tight junction-associated protein 1 isoform X3	649.132
contig_1293	A0A1S3RVI3	cathepsin S-like	648.289
contig_3120	B5DGN4	Transcription factor BTF3	640.956
contig_471	B9EPL9	Prothymosin alpha	640.142
contig_3028	A0A0H4NLE4	ORF2 protein	606.337
contig_2155	A0A1S3NHN7	60S ribosomal protein L21	603.296
contig_476	E0R869	40S ribosomal protein S3a	601.833
contig_1195	B5XDA7	60S ribosomal protein L23a	601.507
contig_2398	C1BXB7	40S ribosomal protein S23	600.835
contig_3	B5DGA8	40S ribosomal protein S2	595.248
contig_2979	A0A1S3RTI0	Lysozyme g	582.64
contig_2735	B5X7R3	Ribosomal protein L19	577.259
contig_91	A0A1S3LC55	H-2 class II histocompatibility antigen, I-E beta chain	562.575
contig_4515	A0A1S3S2X9	Anion exchange protein	557.913
contig_3796	A0A1S3T5D6	complement factor D-like	553.638
contig_162	A0A1S3PNW8	plastin-2	551.888
contig_717	A0A1S3S533	hemoglobin subunit beta-1-like	551.366
contig_2914	C0H7K2	40S ribosomal protein S23	550.71
contig_1789	B5DGY4	DNA-(apurinic or apyrimidinic site) lyase	547.052
contig_477	C1BWY1	40S ribosomal protein S3a	542.631
contig_625	A0A1S3S330	Coronin	541.091
contig_1068	B5X4R7	Transketolase	538.847
contig_1102	A0A1S3RC86	Anion exchange protein	535.218
contig_34	A0A1S3SU94	protein HID1-like isoform X4	523.059
contig_666	A0A1S3PLT4	uncharacterized protein LOC106586027	521.189
contig_3352	E0R8Z1	Cold-inducible RNA-binding protein	492.103
contig_41	M4UZV9	60S ribosomal protein L6	491.474
contig_1379	A0A1S3PW39	Transaldolase	481.388
contig_7443	A0A1S3PY36	uncharacterized protein LOC106588302	471.165
contig_3837	B5XBI0	Probable Ribosome biogenesis protein RLP24	470.12
contig_626	C0H959	Coronin	465.918
contig_644	A0A1S3NZ03	plastin-2	458.987
contig_11146	A0A1S3KX88	non-muscle caldesmon-like	455.083
contig_3718	C0H7H4	Ribosomal protein L37	451.912
contig_914	C0H9U3	6-phosphogluconate dehydrogenase, decarboxylating	450.589
contig_102754	A0A1S3PI65	E1A-binding protein p400-like isoform X3	446.358
Cluster 3: Ctrl up-regulated
Contigs	ID	Annotation	TPM_Ctrl
contig_22	E2JDK0	Cytochrome c oxidase subunit 1	4476.08
contig_1790	B5DGI5	60S ribosomal protein L12	3334.82
contig_117	Q85Q94	Cytochrome b (Fragment)	2695.9
contig_1221	C0H7E7	40S ribosomal protein S14	2456.72
contig_2120	B5X6U7	60S ribosomal protein L27a	2131.39
contig_547	A0A1S3SBV8	40S ribosomal protein S24	1930.94
contig_283	B5X7J4	60S ribosomal protein L3	1891.08
contig_448	E0R869	40S ribosomal protein S3a	1878.99
contig_797	B5DG02	60S ribosomal protein L9	1854.69
contig_269	B5DGW4	60S ribosomal protein L7	1633.76
contig_422	B5DGC4	Ribosomal protein L4-b	1549.81
contig_271	C0H748	60S ribosomal protein L8	1549.74
contig_1309	B9ELE8	Ubiquitin carboxyl extension protein 80	1493.76
contig_3203	B5X6X8	40S ribosomal protein S24	1424.91
contig_841	B5XCY0	60S ribosomal protein L18	1418.46
contig_51	B5X748	60S ribosomal protein L24	1392.02
contig_1171	C0H7D2	60S ribosomal protein L35a	1304.69
contig_1563	B5DGQ9	Ferritin	1286.6
contig_436	B5DGH0	60S ribosomal protein L5	1222.88
contig_839	M4V3H0	40S ribosomal protein S4	1179.44
contig_1172	C0H7D2	60S ribosomal protein L35a	1156.11
contig_1047	A0A1S3RZT9	40S ribosomal protein S27	1154.95
contig_956	C0H7I9	40S ribosomal protein S15	1152.68
contig_2183	B5XA03	40S ribosomal protein S28	1137.24
contig_1428	B5DGK7	40S ribosomal protein S8	1127.1
contig_2184	B5XA03	40S ribosomal protein S28	1022.55
contig_476	E0R869	40S ribosomal protein S3a	990.575
contig_632	B5DGV3	Ribosomal protein L15	981.104
contig_1879	C0H7R2	Ribosomal protein L37	970.872
contig_1344	B5DGI1	60S ribosomal protein L28	969.8
contig_2437	M4V3H3	60S ribosomal protein L27a	942.195
contig_3312	A0A1S3N251	tight junction-associated protein 1 isoform X3	929.745
contig_3120	B5DGN4	Transcription factor BTF3	906.223
contig_2398	C1BXB7	40S ribosomal protein S23	904.864
contig_1195	B5XDA7	60S ribosomal protein L23a	888.297
contig_3	B5DGA8	40S ribosomal protein S2	882.183
contig_1435	B5XB84	Cofilin-2	873.726
contig_2198	A0A1S3NHN7	60S ribosomal protein L21	870.833
contig_477	C1BWY1	40S ribosomal protein S3a	786.172
contig_2914	C0H7K2	40S ribosomal protein S23	772.618
contig_1380	A0A1S3PW39	Transaldolase	768.571
contig_2735	B5X7R3	Ribosomal protein L19	746.276
contig_2309	A0A1S3QSP3	40S ribosomal protein S8	714.57
contig_2155	A0A1S3NHN7	60S ribosomal protein L21	700.116
contig_2026	B5DGL2	Ubiquitin-60S ribosomal protein L40	689.932
contig_3352	E0R8Z1	Cold-inducible RNA-binding protein	681.067
contig_2979	A0A1S3RTI0	Lysozyme g	633.799
contig_3718	C0H7H4	Ribosomal protein L37	611.386
contig_2147	B5DGV2	Ribosomal protein	604.792
contig_957	C0H7I9	40S ribosomal protein S15	584.695
contig_10642	B5RI35	40S ribosomal protein S9 (Fragment)	579.7
contig_41	M4UZV9	60S ribosomal protein L6	578.213
contig_1789	B5DGY4	DNA-(apurinic or apyrimidinic site) lyase	575.064
contig_4166	B5XCG7	Ribosomal protein L37	562.787
contig_3268	B5X3K2	Glyceraldehyde-3-phosphate dehydrogenase	538.938
contig_2478	A0A1S3QLG9	Polyadenylate-binding protein	504.396
contig_1347	B5RI39	40S ribosomal protein S17 (Fragment)	469.192
contig_6431	C0H7D0	ATP synthase membrane subunit f	464.839
contig_1518	C0H8L4	60S ribosomal protein L28	452.502
contig_680	C0H9I1	Fructose-bisphosphate aldolase	448.556
contig_1194	B5XDA7	60S ribosomal protein L23a	391.65
contig_823	A0A1S3MYZ0	Phosphate carrier protein, mitochondrial	344.027
contig_13582	B5XE87	Protein transport protein Sec61 subunit beta	342.151
contig_537	A0A1S3SBV8	40S ribosomal protein S24	337.822
contig_201	A0A1S3MCV1	nascent polypeptide-associated complex subunit alpha, muscle-specific form-like isoform X2	330.408
contig_333	B5X3K2	Glyceraldehyde-3-phosphate dehydrogenase	326.772
contig_3750	C0H7G0	Ribosomal protein L37	323.018
contig_9760	A0A1S3L209	phosphatidylinositol-binding clathrin assembly protein-like isoform X3	321.798
contig_646	B5RI37	Eukaryotic translation elongation factor 1 gamma (Fragment)	320.093
contig_6907	not available		309.112
contig_2799	B5DGD5	Arp2/3 complex 34 kDa subunit	294.914
contig_3720	B5XFT9	Iron-sulfur cluster assembly enzyme ISCU mitochondrial	293.772
contig_9096	A0A1S3RBA9	Sulfotransferase	286.239
contig_2907	B5DGT0	Myosin regulatory light chain 2, smooth muscle isoform	275.093
contig_3121	B5DGN4	Transcription factor BTF3	266.471
contig_6906	A0A1S3LMA7	sterile alpha motif domain-containing protein 11-like isoform X2	259.839
contig_600	C0HB50	RNA helicase	256.839
contig_1760	A0A1S3PT36	trans-1,2-dihydrobenzene-1,2-diol dehydrogenase-like	256.803
contig_863	A0A1S3N5Z7	60S ribosomal protein L18-like	256.257
contig_386	C0H8F4	Tetraspanin	255.402
contig_2754	A0A1S3S3A3	Eukaryotic translation initiation factor 3 subunit D	235.777
contig_6905	A0A1S3RDU7	aminoacyl tRNA synthase complex-interacting multifunctional protein 1	234.225
contig_6934	A8C5I4	Transposase	233.786
contig_364	Q9PSX2	GTP-binding nuclear protein Ran (Fragment)	231.013
contig_20004	A0A1S3LZC7	Chromodomain-helicase-DNA-binding protein 8	229.874
contig_601	A0A1S3RB11	RNA helicase	215.28
contig_10238	B5XG35	60S ribosomal protein L32	214.693
contig_9095	A0A1S3N8X1	tripartite motif-containing protein 7-like	214.547
contig_2648	A0A1S3P2D1	parathymosin-like	213.135
contig_7922	C0HB50	RNA helicase	204.183
contig_1378	C0HBM9	RING-type E3 ubiquitin transferase	200.272
contig_1974	B9ENC0	Cellular nucleic acid-binding protein	200.228
contig_3095	A0A1S3RAH8	Serine/threonine-protein phosphatase	197.172
contig_771	B9EQH1	Cellular nucleic acid-binding protein	195.163
contig_4592	B5X326	Plasminogen activator inhibitor 1 RNA-binding protein	194.351
contig_677	A0A1S3PHK8	protein SET-like	192.318
contig_3406	B5XFV7	Eukaryotic translation initiation factor 3 subunit G	190.069
contig_5564	B5X9B8	Protein BCCIP homolog	187.558
contig_499	A0A1S3T0X3	high mobility group nucleosome-binding domain-containing protein 3-like isoform X1	180.025
Cluster 4: shared SHK-1_HK upregulated
Contigs	ID	Annotation	TPM _SHK1	TPM_HK
contig_19	A0A0H4NLE4	ORF2 protein	563.207	1104.33
contig_1182	A0A0H4NLE4	ORF2 protein	300.813	638.264
contig_4376	B5XBH9 Tri	Tripartite motif-containing protein 25	385.613	542.328
contig_10495	A0A1S3MJG6	TBC1 domain family member 15-like	94.7491	536.809
contig_8671	A0A0H4NLE9	Ribonuclease H	307.053	432.94
contig_5924	A0A0H4NLE9	Ribonuclease H	190.452	217.306
contig_28677	A0A1S3NF76	mitochondrial amidoxime-reducing component 1-like	78.2586	121.196
contig_33349	A0A1S3SWQ6	LOW QUALITY PROTEIN: neuroblast differentiation-associated protein AHNAK-like	417.862	91.6729
contig_1507	A0A1S3PYH8	major histocompatibility complex class I-related gene protein-like isoform X1	55.2384	85.1374
contig_20841	A0A1S3LBK2	uncharacterized protein LOC106565584	73.5425	80.3718
contig_12304	A0A1S3L5Z9	myosin-9-like isoform X1	38.4711	64.2506
contig_200	A0A1S3N1F5	ubiquitin-conjugating enzyme E2 H-like	52.0661	63.2385
contig_7302	A0A1S3RQ55	MORC family CW-type zinc finger protein 3-like isoform X1	4.28133	59.4175
contig_13249	B5X3G7 Gra	nulocyte colony-stimulating factor receptor	5.04703	58.1356
contig_22686	A0A1S3NRF5	alpha-actinin-4 isoform X5	59.115	58.1195
contig_11989	A0A0H4NLE9	Ribonuclease H	63.0328	57.4887
contig_11107	A0A1S3SYI2	alpha-actinin-4 isoform X7	72.4123	56.0237
contig_7992	C0HA39 Het	erogeneous nuclear ribonucleoprotein U-like protein 1	39.9891	55.0043
contig_14048	A0A1S3Q733	ubiquitin carboxyl-terminal hydrolase 42	51.8371	52.1892
contig_3902	A0A1S3PBE8	FAS-associated factor 1-like isoform X1	32.2019	50.6534
contig_8876	A0A1S3KZ41	Poly [ADP-ribose] polymerase	16.4275	50.2103
contig_4069	A0A1S3S0C7	protein NLRC3-like	32.4431	50.2055
contig_2018	A0A1S3N0N3	uncharacterized protein LOC106576300	29.3604	47.5566
contig_41692	A0A1S3LBK2	uncharacterized protein LOC106565584	54.2842	47.4482
contig_17221	A0A1S3NMW9	MOB kinase activator 1A	9.73201	44.6168
contig_27904	A0A1S3S016	putative oxidoreductase GLYR1	44.3154	44.2764
contig_3788	A0A1S3MAY2	protein FAM49A isoform X2	6.16098	43.3265
contig_5711	A0A0H4NLE9	Ribonuclease H	30.3482	42.3607
contig_2215	A0A1S3MMV2	Nuclear pore complex protein Nup93	22.2993	41.99
contig_12862	B9EML5 Deo	xyribonuclease gamma	53.3178	40.2791
contig_40038	A0A0H4NLE4	ORF2 protein	12.9342	38.6925
contig_8216	A0A1S3T0C2	Importin subunit alpha	28.6133	38.2749
contig_16088	A0A1S3PTS8	rho GTPase-activating protein 1-like	31.1376	38.0154
contig_45908	A0A0H4NLE9	Ribonuclease H	39.894	37.8001
contig_3309	A0A1S3R1M8	Phospholipase A2	23.278	37.595
contig_17332	A0A1S3M2D9	microtubule-actin cross-linking factor 1-like isoform X16	29.054	37.0817
contig_10196	A0A1S3RZ19	rho guanine nucleotide exchange factor 1 isoform X4	18.5498	35.9948
contig_5000	A0A1S3SML7	protein quaking-A-like isoform X1	32.7694	35.5115
contig_29769	A0A1S3ME13	contactin-4-like isoform X1	19.8519	35.4813
contig_1236	A0A1S3KJQ3	zinc finger protein 638-like	21.9003	35.3884
contig_21681	A0A1S3QGA4	Synaptogyrin	15.5946	34.428
contig_2608	A0A1S3R735	muscleblind-like protein 1 isoform X10	32.58	34.3052
contig_6254	A0A1S3SS71	vam6/Vps39-like protein isoform X2	24.6004	34.1102
contig_7982	A0A1S3KKM7	phosducin-like protein isoform X1	25.461	33.9887
contig_16037	A0A1S3P919	serine/threonine-protein kinase TAO2-like isoform X2	19.6429	33.8603
contig_13041	A0A0H4NLE4	ORF2 protein	15.2778	32.4319
contig_31345	A0A1S3L5E5	Choline transporter-like protein	22.2076	32.0738
contig_5555	A0A1S3NY41	Poly [ADP-ribose] polymerase	34.2504	32.073
contig_18412	A0A1S3QER5	uncharacterized protein LOC106591231	37.927	31.5946
contig_16648	A0A1S3RYZ2	leukocyte receptor cluster member 8 homolog	8.31334	31.5079
contig_17105	A0A0H4NLE4	ORF2 protein	19.1081	31.1168
contig_28595	A0A1S3KUJ8	Disintegrin and metalloproteinase domain-containing protein 10	38.1837	31.0938
contig_40537	A0A1S3QSN7	eukaryotic translation initiation factor 3 subunit A-like isoform X2	15.464	30.659
contig_32126	A0A1S3MAW0	WD repeat-containing protein 26 isoform X2	23.3788	30.6004
contig_17765	A0A1S3NIS8	probable polyketide synthase 1	9.66166	30.1561
contig_45550	A0A1S3RAL2	Dynamin GTPase	16.6809	29.7512
contig_18465	A0A1S3RYC4	aryl hydrocarbon receptor nuclear translocator isoform X4	17.8096	29.1534
contig_26599	A0A1S3SWQ6	LOW QUALITY PROTEIN: neuroblast differentiation-associated protein AHNAK-like	45.0157	29.0422
contig_40444	A0A0H4NLE9	Ribonuclease H	37.2451	28.8067
contig_82318	A0A1S3QJT4	uncharacterized protein LOC106593226	15.8932	28.6545
contig_19026	A0A1S3Q8E5	Phosphatidate phosphatase	18.4733	28.5921
contig_29715	C0HAM1 Ser	ine/threonine-protein kinase PCTAIRE-2	32.4416	27.7498
contig_38923	B5X232 Pol	ypyrimidine tract-binding protein 2	23.6317	27.7344
contig_4561	A0A1S3KZ41	Poly [ADP-ribose] polymerase	12.2952	27.719
contig_7604	A0A1S3SX32	Metalloproteinase inhibitor 2	21.2748	27.6996
contig_10059	A0A1S3LXW4	Vesicle-fusing ATPase	11.418	27.6583
contig_6131	B9ELQ1 Hea	t shock cognate 71 kDa protein	19.724	27.4188
contig_19480	A0A1S3PIL4	drebrin-like protein isoform X3	16.2627	26.7236
contig_15807	A0A1S3LK11	Structural maintenance of chromosomes protein	23.6085	26.7004
contig_19968	A0A1S3Q2Q3	alpha-taxilin-like	33.0945	26.5198
contig_15817	A0A1S3PU69	Deubiquitinating enzyme 47	24.1663	26.2203
contig_4880	A0A1S3R3M1	E3 ubiquitin/ISG15 ligase TRIM25-like	20.3506	26.1885
contig_34839	A0A1S3PSJ3	G1/S-specific cyclin-D1	21.962	26.1136
contig_7921	A0A1S3N1C3	probable E3 ubiquitin-protein ligase HERC1	14.2221	26.1049
contig_39463	A0A1S3KZ18	Poly [ADP-ribose] polymerase	8.69143	25.8624
contig_1571	A0A1S2X433	Antigen KI-67	14.9531	25.5552
contig_8148	A0A1S3S0I2	neuronal-specific septin-3-like	13.6285	25.1752
contig_14714	A0A1S3RC15	Dynamin GTPase	15.0973	24.9884
contig_7991	A0A1S3RIU4	heterogeneous nuclear ribonucleoprotein U-like protein 1 isoform X3	26.2973	24.9203
contig_2057	A0A1S3SK58	neurotrophin receptor-interacting factor 1-like isoform X1	17.5872	24.8538
contig_17158	B5DFY9 NED	D8-activating enzyme E1 regulatory subunit	16.9406	24.6977
contig_11106	A0A1S3NRF5	alpha-actinin-4 isoform X5	36.0449	24.5423
contig_6603	A0A1S3Q0H9	uncharacterized protein LOC106588723	14.1556	24.5109
contig_32069	A0A1S3NNX3	Condensin complex subunit 2	14.5302	24.4632
contig_68608	A0A1S3N112	voltage-dependent P/Q-type calcium channel subunit alpha-1A-like isoform X1	16.0483	24.2962
contig_1237	A0A1S3KX48	homeodomain-interacting protein kinase 3-like isoform X1	20.7295	24.1432
contig_35119	A0A1S3R2Q4	DEAH box protein 9	24.3005	24.0044
contig_25648	B5X4Y7 Cha	rged multivesicular body protein 3	0	23.9195
contig_7885	A0A1S3R3X4	apoptotic chromatin condensation inducer in the nucleus-like	18.8381	23.8745
contig_8658	A0A1S3S0L5	metastasis suppressor protein 1-like	12.8206	23.5388
contig_8375	A0A1S3QP27	zinc finger and BTB domain-containing protein 8B-like	1.53208	23.3974
contig_21029	A0A1S3L9Z9	calcium-dependent secretion activator 1-like isoform X11	17.9144	23.2978
contig_26611	A0A1S3SWQ6	LOW QUALITY PROTEIN: neuroblast differentiation-associated protein AHNAK-like	51.6198	23.0166
contig_11690	A0A1S3KR21	eukaryotic translation initiation factor 4 gamma 2-like	21.8549	22.9699
contig_4492	A0A1S3Q4M8	Glutamate dehydrogenase	21.7515	22.9587
contig_46722	A0A1S3MSZ8	ON-like isoform X1	13.4493	22.8973
contig_8642	A0A1S3S0C7	protein NLRC3-like	6.256	22.5435

## Sheet: Table S2
Table S2: Differential expression genes (DEGs) annotations
DEGs SHK-1 Up-regulated					DEGs HK Up-regulated
Contig	ID	Name	Fold Change		Contig	ID	Name	Fold Change
contig_126759	A0A1S3SDD4	uncharacterized protein LOC106608757 isoform X2	15055651463785		contig_37379	A0A1S3LXH9	Oxoglutarate dehydrogenase (succinyl-transferring)	4335952816284
contig_115679	B5X1A7	C4orf29 homolog	12906212334479		contig_6922	A0A1S3SDI7	ATP-binding cassette sub-family A member 1-like isoform X2	1027884117302
contig_126861	A0A1S3RIL6	uncharacterized protein LOC106603071	8705035854484		contig_15854	A0A1S3PIR5	complement C1q-like protein 2	766079706078
contig_128013	A0A1S3SFQ2	pleckstrin homology domain-containing family A member 5-like isoform X12	7532614511234		contig_4944	A0A1S3P9E8	myomegalin-like isoform X8	584819780028
contig_127535	A0A1S3PKT1	Protein yippee-like	1535067442729		contig_35150	A0A1S3SMH1	MAPK/MAK/MRK overlapping kinase-like isoform X1	419603673001
contig_121222	A0A1S3MCD9	fibrillin-2	1522178333966		contig_76406	A0A1S3P9Z9	protein furry homolog-like isoform X19	356203095036
contig_72624	A0A1S3Q091	transcription factor HIVEP3-like isoform X2	774610025737		contig_17171	A7KIM2	COL11A2 (Fragment)	321420473375
contig_86229	A0A1S3SX58	rho GTPase-activating protein 35-like	761720916974		contig_27648	A0A1S3SDT2	homeobox and leucine zipper protein Homez-like	301552880231
contig_126791	A0A1S3KVI6	Wilms tumor protein 1-interacting protein homolog	725141360855		contig_62974	A0A1S3MGY1	uncharacterized protein LOC106572570	287890326529
contig_117767	A0A1S3P7D1	plectin-like isoform X3	723053590686		contig_65041	A0A1S3M5A4	protein lifeguard 1-like	287890326529
contig_110244	A0A1S3M4Z0	ribonuclease ZC3H12A	671497155636		contig_67091	A0A1S3Q1T0	uncharacterized protein LOC106588904 isoform X1	287890326529
contig_109190	A0A1S3PSN4	MTSS1-like protein isoform X6	607051611823		contig_23056	A0A1S3KWE7	ceramide synthase 2-like	268485509883
contig_106298	A0A1S3MZV5	mucin-19-like	503938741722		contig_28235	B1H3N0	Claudin	260565219127
contig_131817	A0A1S3R5Y9	GREB1-like protein	503938741722		contig_40495	A0A1S3QWG8	myosin-11-like	260565219127
contig_75545	A0A1S3PCD1	plexin-B2-like	501005257698		contig_41129	A0A1S3S0Z0	cell surface A33 antigen-like isoform X2	233240111724
contig_109065	A0A1S3PVE0	talin-2-like	442255028735		contig_49849	A0A1S3S293	Poly [ADP-ribose] polymerase	233240111724
contig_54658	A0A1S3RXU8	toll-like receptor 13	406302557219		contig_52884	A0A1S3ND53	uncharacterized protein LOC106578729 isoform X1	233240111724
contig_86548	A0A1S3SZJ4	dystonin-like isoform X24	400825871622		contig_76773	A0A1S3LT28	contactin-associated protein-like 4	233240111724
contig_122231	A0A1S3T1I3	Nitric oxide synthase	387936762859		contig_67012	A0A1S3M2S1	ATPase family AAA domain-containing protein 2-like isoform X7	223254339628
contig_132618	A0A1S3MUI5	zinc finger protein 385B-like isoform X4	387936762859		contig_2069	A0A1S3RNH8	solute carrier family 22 member 13-like isoform X5	219577558022
contig_132933	A0A1S3SUY8	matrix-remodeling-associated protein 5-like	387936762859		contig_17949	A0A1S3LWY8	CMP-N-acetylneuraminate-beta-1,4-galactoside alpha-2,3-sialyltransferase-like isoform X4	219577558022
contig_54557	A0A1S3LA12	Protein-tyrosine-phosphatase	378045516856		contig_28711	A0A1S3PMR4	putative methyltransferase DDB	219577558022
contig_15439	A0A1S3NY64	protein dopey-2-like	375047654097		contig_57372	A0A1S3RDK5	F-box/WD repeat-containing protein 7	219577558022
contig_68968	A0A1S3M7D5	WD repeat and FYVE domain-containing protein 3	375047654097		contig_64261	C0HA46	CYPVII	219577558022
contig_89344	A0A1S3SU89	protocadherin gamma-A11-like	375047654097		contig_23580	A0A1S3P9S0	nuclear autoantigenic sperm protein-like isoform X3	2131228758
contig_128216	A0A1S3KYM9	tenascin-like isoform X1	375047654097		contig_6778	A0A1S3Q707	Hexokinase	205915004321
contig_123016	A0A1S3RW71	growth factor receptor-bound protein 10-like isoform X7	349269436572		contig_33705	A0A1S3NUM6	Ubiquitinyl hydrolase 1	205915004321
contig_129198	A0A1S3Q091	transcription factor HIVEP3-like isoform X2	349051086725		contig_47787	A0A1S3NX41	PHD finger protein 1-like isoform X1	205915004321
contig_128721	A0A1S3NJT5	Nitric oxide synthase	338760029179		contig_51717	A0A1S3N9B1	[Histone H3]-lysine(4) N-methyltransferase	205915004321
contig_83147	A0A1S3NNI2	Clathrin heavy chain	336380327809		contig_55284	A0A1S3RVA2	Deoxyribonuclease II	205915004321
contig_32624	A0A1S3ST45	protocadherin Fat 4-like	331860362542		contig_74744	A0A1S3Q5Y6	Mu-type opioid receptor	205915004321
contig_46252	A0A1S3RW08	Receptor protein-tyrosine kinase	323491219046		contig_103514	A0A1S3SLH5	neuronal pentraxin-2-like	205915004321
contig_67313	A0A1S3MKV2	zinc finger protein 469-like	323491219046		contig_21760	A0A1S3KRT2	uncharacterized protein LOC106561718	20008667737
contig_85079	A0A1S3P7I6	plectin-like isoform X6	311161362631		contig_54482	A0A1S3LHP1	leucine-rich repeat neuronal protein 1-like	20008667737
contig_21181	A0A1S3SSQ1	Cyclic nucleotide ras GEF	310602110284		contig_34730	A0A1S3KIE8	Nucleoprotein TPR	192695628799
contig_71375	A0A1S3NJZ6	macoilin-2-like isoform X1	310602110284		contig_50336	A0A1S3Q0K6	microtubule-actin cross-linking factor 1, isoforms 1/2/3/5-like isoform X19	192695628799
contig_71664	A0A1S3L8U7	msx2-interacting protein-like isoform X6	310602110284		contig_6580	C6EWZ5	Basic fibroblast growth factor	19225245062
contig_95303	A0A1S3MK65	laminin subunit beta-1-like	310602110284		contig_10250	A0A1S3SF67	uncharacterized protein LOC106609103 isoform X4	19225245062
contig_123863	A0A1S3PBX5	leucine-rich repeat-containing protein 7-like isoform X17	310602110284		contig_31839	A0A1S3S114	E3 ubiquitin-protein ligase RNF213-like isoform X4	19225245062
contig_128357	A0A1S3SMA5	Tyrosine-protein kinase receptor	310602110284		contig_33608	A0A1S3PM86	transcription factor Sp3-like isoform X4	19225245062
contig_111083	A0A1S3NUE4	protocadherin Fat 3-like	297713001521		contig_44762	A0A1S3PDX5	patatin-like phospholipase domain-containing protein 2	19225245062
contig_123177	A0A1S3M8G9	uncharacterized protein LOC106571236 isoform X2	297713001521		contig_49875	A0A1S3KNA1	transcription factor SOX-6-like isoform X1	19225245062
contig_50967	A0A1S3NBI7	uncharacterized protein K02A2.6	297079373077		contig_67448	A0A1S3LXF0	uncharacterized protein LOC106569078	19225245062
contig_84124	A0A1S3MSA4	fibronectin type III domain-containing protein 3B	288775153202		contig_83815	A0A1S3QN40	collagen alpha-2(VI) chain-like isoform X1	19225245062
contig_105294	B5XD93	Oigosaccharyltransferase complex subunit	287812424653		contig_104252	A0A1S3KP85	cilia- and flagella-associated protein 44	19225245062
contig_64896	A0A1S3P7G3	plectin-like isoform X9	286699098233		contig_21090	A8C5I2	Transposase	191675737019
contig_50606	A0A1S3P0Z3	ras-associated and pleckstrin homology domains-containing protein 1-like	284823892759		contig_13512	A0A1S3SS91	tRNA nuclease CdiA-like isoform X12	187821669073
contig_100965	A0A1S3RV44	AF4/FMR2 family member 2-like isoform X2	284823892759		contig_64137	B5X9M8	EF-hand calcium-binding domain-containing protein 1	185304580228
contig_105911	A0A1S3P086	muscleblind-like protein 2a isoform X4	284823892759		contig_14035	A0A1S3M3R7	phytanoyl-CoA dioxygenase domain-containing protein 1	178589896918
contig_126409	A0A1S3MZK3	inter-alpha-trypsin inhibitor heavy chain H5-like isoform X1	284823892759		contig_37618	A0A1S3PEG1	beta-adducin isoform X5	178589896918
contig_126786	A0A1S3RBI8	nuclear GTPase SLIP-GC-like isoform X2	284823892759		contig_72720	A0A1S3KQT9	homeodomain-interacting protein kinase 3 isoform X2	178589896918
contig_136298	A0A1S3RKX2	neuroligin-3-like isoform X3	284823892759		contig_75664	A0A1S3QYK5	ataxin-1-like	178589896918
contig_97070	A0A1S3PTF5	Piezo-type mechanosensitive ion channel component	278391092027		contig_83071	A0A1S3MDK7	ubiquitin conjugation factor E4 B isoform X5	178589896918
contig_126296	A0A1S3M3Y9	protein FAM135B-like	276952729428		contig_87711	A0A1S3R7B9	synembryn-A-like	178589896918
contig_45558	A0A1S3N9L3	uncharacterized protein L	271934783996		contig_53836	A0A1S3LXF1	Phosphodiesterase	177913531657
contig_75249	A0A1S3LDH6	forkhead box protein P4-like isoform X2	271934783996		contig_44394	A0A1S3KZI8	germ cell-less protein-like 1 isoform X5	172597020484
contig_105287	A0A1S3MLU0	furin-like	271934783996		contig_32062	A0A1S3PSX8	dematin isoform X4	171233176947
contig_122673	A0A1S3KJQ6	fibronectin type III domain-containing protein 7	271934783996		contig_58779	C0H7T4	Transposable element Tcb1 transposase	168386279803
contig_125342	A0A1S3RHI1	nuclear factor related to kappa-B-binding protein-like isoform X3	271934783996		contig_18488	A0A1S3RQ34	Non-specific serine/threonine protein kinase	164927343217
contig_129261	A0A1S3LC62	proline-rich receptor-like protein kinase PERK8	271934783996		contig_20452	A0A1S3P7J1	E3 ubiquitin-protein ligase RNF213-like	164927343217
contig_129461	A0A1S3Q8B3	uracil nucleotide/cysteinyl leukotriene receptor-like	271934783996		contig_22835	A0A1S3L3X9	endogenous retrovirus group 3 member 1 Env polyprotein-like	164927343217
contig_68544	A0A1S3MKA7	asc-type amino acid transporter 1-like	271370468672		contig_43484	A0A1S3M4H6	cilia- and flagella-associated protein 69 isoform X2	164927343217
contig_64895	A0A1S3P7G3	plectin-like isoform X9	265543967945		contig_45979	C1BZP9	ESOLU Transposable element Tcb1 transposase	164927343217
contig_59409	A0A1S3S5Y7	MKL/myocardin-like protein 2 isoform X3	264982328879		contig_46038	A0A1S3QPA6	DNA-directed RNA polymerase II subunit RPB1	164927343217
contig_126498	A0A1S3S0M8	BAH and coiled-coil domain-containing protein 1-like	262863696171		contig_52909	A0A1S3RSE2	Phospholipid-transporting ATPase	164927343217
contig_127843	A0A1S3RUZ0	rho guanine nucleotide exchange factor 37-like isoform X1	262863696171		contig_57037	A0A1S3MUG6	protein TANC1-like isoform X3	164927343217
contig_108078	A0A1S3RSX4	TBC1 domain family member 2A-like isoform X2	259045675233		contig_60225	B5X3X1	DnaJ homolog subfamily B member 12	164927343217
contig_115487	A0A1S3RSU5	sorbin and SH3 domain-containing protein 1-like isoform X7	259045675233		contig_63281	A0A1S3T6R7	protein zyg-11 homolog	164927343217
contig_118450	A0A1S3SZH9	dystonin-like isoform X22	259045675233		contig_64207	A0A1S3NJF2	Non-specific serine/threonine protein kinase	164927343217
contig_128858	A0A1S3MJP3	HGF/SF receptor	259045675233		contig_64433	A0A1S3NIB1	[Histone H3]-lysine(4) N-methyltransferase	164927343217
contig_129619	A0A1S3RPL7	glutamate receptor 1-like isoform X2	259045675233		contig_66490	A0A1S3QX54	CCR4-N	164927343217
contig_130879	A0A1S3PV11	probable C-mannosyltransferase DPY19L3 isoform X3	259045675233		contig_70685	A0A1S3KLB4	potassium/sodium hyperpolarization-activated cyclic nucleotide-gated channel 1-like	164927343217
contig_132677	A0A1S3LRP0	protocadherin alpha-8-like	259045675233		contig_71039	A0A1S3P2X3	zinc fingers and homeoboxes protein 3-like	164927343217
contig_54917	A0A1S3QJ70	Receptor protein serine/threonine kinase	255964029534		contig_81918	A0A1S3KKX9	Non-specific serine/threonine protein kinase	164927343217
contig_125401	A0A1S3MRY2	unconventional myosin-X-like	254264569142		contig_88628	A0A1S3S063	uncharacterized protein LOC106606069 isoform X1	164927343217
contig_94501	A0A1S3P3U4	forkhead box protein P4-like isoform X3	250127094147		contig_92800	A0A1S3PVN5	protein regulator of cytokinesis 1-like	164927343217
contig_100818	A0A1S3MDS2	protein Shroom3-like isoform X8	249064362897		contig_101721	A0A1S3LUL4	LOW QUALITY PROTEIN: arf-GAP with SH3 domain, ANK repeat and PH domain-containing protein 1	164927343217
contig_116044	A0A1S3RK87	angiomotin-like isoform X2	249064362897		contig_3587	A0A1S3QV60	collagen alpha-1(VI) chain-like	162586606692
contig_126316	A0A1S3NSD6	short transient receptor potential channel 4-like	246415297068		contig_18810	A0A1S3M334	[Histone H3]-lysine(4) N-methyltransferase	162465556656
contig_86624	A0A1S3L6K7	SH3 and PX domain-containing protein 2A-like isoform X5	246156566471		contig_42527	A0A1S3L693	ATPase family AAA domain-containing protein 5-like isoform X4	342540541335
contig_94292	A0A1S3N0K3	membrane-associated guanylate kinase, WW and PDZ domain-containing protein 2-like	246156566471		contig_37552	C0HBS6	DNA-binding protein Ikaros	246902665425
contig_96262	A0A1S3SZH9	dystonin-like isoform X22	246156566471		contig_48841	A0A1S3LG48	zinc finger protein PLAGL2-like isoform X2	246902665425
contig_113710	A0A1S3QWU2	kinesin-like protein KIF13A	246156566471		contig_57973	A0A1S3MNI6	Protein arginine N-methyltransferase	246902665425
contig_116587	A0A1S3PXG0	IgGFc-binding protein-like	246156566471		contig_35890	A0A1S3T4W6	uncharacterized protein LOC106613651	177662752399
contig_130477	A0A1S3QJZ7	histone-lysine N-methyltransferase SETD2-like	246156566471		contig_70139	A0A1S3PL07	arrestin domain-containing protein 3-like	163131434516
contig_42788	A0A1S3QN73	transcriptional coactivator YAP1-like	245250934175		contig_1017	A0A1S3QHS9	uncharacterized protein LOC106592761	316337859815
contig_45079	A0A1S3QIB0	protein NLRC3-like	233267457708		contig_3587	A0A1S3QV60	collagen alpha-1(VI) chain-like	16.2587
DEGs SHK-1 Down-regulated					DEGs HK Down-regulated
Contig	ID	Name	Fold Change		Contig	ID	Name	Fold Change
contig_625	A0A1S3S330	Coronin	-274000000000000		contig_126323	A0A1S3P9G0	paired mesoderm homeobox protein 1-like isoform X1	-266814932823909
contig_3227	A0A1S3NRI3	high affinity immunoglobulin gamma Fc receptor I-like isoform X1	-228000000000000		contig_63466	B5XCI8	Ras-related protein Rab-27B	-16308373371833
contig_626	C0H959	Coronin	-218000000000000		contig_112907	A0A1S3QBC2	transient receptor potential cation channel subfamily A member 1-like	-14232011848698
contig_1420	A0A1S3S330	Coronin	-216000000000000		contig_22773	A0A1S3S8J7	Clusterin	-135294765124479
contig_1062	C0H9B4	Transcription factor PU.1	-211000000000000		contig_118645	A0A1S3RJR4	protein NLRC3-like isoform X3	-123294044279172
contig_483	B5X7S6	Metalloendopeptidase	-153000000000000		contig_75821	A0A1S3NYL4	retinoic acid receptor beta-like isoform X2	-99663486358973
contig_1881	B5X4B3	Protein-tyrosine-phosphatase	-146000000000000		contig_126339	B5XBR3	Fibroblast growth factor-binding protein 1	-89151363166532
contig_5273	A0A1S3S0L7	Ig heavy chain Mem5-like	-145000000000000		contig_126917	A0A1S3RZC1	Apolipoprotein H	-86631928093262
contig_8581	A0A1S3PNW8	plastin-2	-139000000000000		contig_60185	A0A1S3QQ41	Tetraspanin	-12849977946482
contig_5917	B5X5A0	Tetraspanin	-125000000000000		contig_107565	A0A1S3SJT6	secreted frizzled-related protein 2-like	-6583853336582
contig_8726	A0A1S3MWL7	interleukin-6 receptor subunit alpha isoform X4	-117000000000000		contig_97021	A0A1S3N3I0	actin-binding LIM protein 1-like isoform X12	-5559634806359
contig_3228	A0A1S3T0B3	high affinity immunoglobulin gamma Fc receptor I-like	-114000000000000		contig_6193	A8C5I2	Transposase	-500081033923
contig_12172	A0A1S3NZ03	plastin-2	-114000000000000		contig_90412	B5X5M3	Otoraplin	-3791779671225
contig_3354	C0H8I6	C-X-C chemokine receptor type 4	-112000000000000		contig_26073	B5XBM7	Annexin	-3641294071413
contig_2983	A0A1S3QTI1	Tetraspanin	-103000000000000		contig_72862	A0A1S3PQZ1	C-X-C motif chemokine 11-like	-3148579771416
contig_11461	B5XGZ0	Cysteine protease	-98700000000000		contig_110044	A0A1S3NFR3	homeobox protein Dlx3b isoform X1	-2991897741198
contig_7351	B5X4P0	C-C chemokine receptor type 9	-92200000000000		contig_104532	B9ELM8	C-X-C motif chemokine 14	-2787435471441
contig_14056	C0H9Y8	Interleukin-6 receptor subunit alpha	-80700000000000		contig_57234	A0A1S3MVR0	microfibrillar-associated protein 5-like	-2558669106288
contig_9061	B5X1M5	Transcription factor MafB	-72200000000000		contig_48586	A0A1S3PXD9	Protein S100	-2550609278258
contig_5235	A0A1S3QPB3	B-cell antigen receptor complex-associated protein alpha chain-like isoform X1	-68900000000000		contig_73564	A0A1S3LIA5	WD repeat-containing protein on Y chromosome-like isoform X2	-2505013060671
contig_162	A0A1S3PNW8	plastin-2	-53000000000000		contig_38142	B5RI68	transposase-like	-2500876268517
contig_11567	Q5K595	MHC class II antigen beta chain (Fragment)	-47200000000000		contig_92079	B5XDA6	T-cell surface antigen CD2	-2307940689982
contig_19647	A0A1S3MX11	C-X-C chemokine receptor type 2-like	-41100000000000		contig_43760	A0A1S3RLB3	rhomboid domain-containing protein 2-like isoform X1	-2271087719951
contig_30893	A0A1S3NZ74	interferon-induced guanylate-binding protein 1-like	-41000000000000		contig_37536	A0A1S3SG36	probable G protein-coupled receptor 85	-2221239418364
contig_1286	A0A1S3L223	cytokine receptor common subunit gamma-like	-38900000000000		contig_106633	A0A1S3MAE7	snRNA-activating protein complex subunit 1-like isoform X1	-2186219475423
contig_749	A0A1S3N4A0	transcription factor COE3-like isoform X6	-38700000000000		contig_29582	A0A1S3N8R9	plasminogen activator inhibitor 1-like	-2176075698324
contig_5129	A0A1S3MQ83	Cysteine protease	-36800000000000		contig_20460	A0A1S3MJQ5	pyrin-like	-2036667324811
contig_15090	A0A1S3KK48	interferon regulatory factor 4-like isoform X1	-33100000000000		contig_26987	A0A1S3NN51	uncharacterized protein LOC106580378	-180058963119
contig_26912	A0A1S3LTE9	Protein-tyrosine sulfotransferase	-30300000000000		contig_122214	A0A1S3PS23	phosphoinositide 3-kinase regulatory subunit 6-like isoform X1	-1734112316504
contig_11412	A0A1S3RRL1	insulin-like growth factor-binding protein-like 1	-21900000000000		contig_78679	A0A1S3P9E1	Ubiquitin carboxyl-terminal hydrolase	-1706007507566
contig_8120	A0A1S3MUH2	T-cell-specific surface glycoprotein CD28-like isoform X1	-20700000000000		contig_12233	B9EML5	Deoxyribonuclease gamma	-1678200785115
contig_15402	A0A1S3PIQ3	caspase recruitment domain-containing protein 9-like isoform X1	-20300000000000		contig_116014	A0A1S3MCC7	B2 bradykinin receptor	-1661503481332
contig_53828	A0A1S3KUP4	Sulfotransferase	-19900000000000		contig_10615	A0A1S3P3I7	arylacetamide deacetylase-like 3	-1560745791258
contig_10757	W0TYL0	Cd28 protein (Fragment)	-19300000000000		contig_17569	A8C5I2	Transposase	-150945686878
contig_763	B9EQA7	Metalloproteinase inhibitor 2	-18300000000000		contig_68572	A0A1S3SB17	neurexin-3b-beta-like	-150805871483
contig_574	Q9DDK6	Tyrosine-protein kinase	-16400000000000		contig_4723	A0A1S2X497	pleckstrin homology-like domain family A member 2	-1496694446306
contig_522	C0H9A3	Protein-tyrosine-phosphatase	-11000000000000		contig_20821	C0HBH2	Transposable element Tcb1 transposase	-1449011282744
contig_7843	B5X2B3	Serotransferrin	-5080000000000		contig_48557	A0A1S3P9V6	Dimethylargininase	-1431950046727
contig_9336	B5X5A0	Tetraspanin	-4660000000000		contig_7623	C0H958	Cadherin-1	-1327692305124
contig_10756	B5X345	T-cell-specific surface glycoprotein CD28	-4570000000000		contig_4257	A0A1S3PCP5	Protein-tyrosine-phosphatase	-1325122485983
contig_1644	A0A1S3PBF7	tumor necrosis factor alpha-induced protein 2 isoform X1	-4410000000000		contig_78247	A0A1S3LC87	epithelial membrane protein 3-like	-1310986344141
contig_133	A0A1S3M7A2	interleukin-31 receptor A isoform X1	-4350000000000		contig_97337	A0A1S3SBM2	aldehyde dehydrogenase family 8 member A1	-1287801359354
contig_14772	A0A1S3KKI3	apoptosis-inducing factor 3-like isoform X1	-3700000000000		contig_124911	A0A1S3Q112	mucin-5AC-like	-1287801359354
contig_6001	A8C5I2	Transposase	-3290000000000		contig_19598	B9ELZ6	Fatty acid-binding protein 7	-1277977218447
contig_3353	A0A1S3NWE4	C-X-C chemokine receptor type 4-like	-2790000000000		contig_13708	A0A1S3NTJ2	C2 domain-containing protein 3 isoform X1	-1262751169676
contig_30075	A0A1S3NS83	toll/interleukin-1 receptor domain-containing adapter protein-like	-2690000000000		contig_118697	B5X7V1	Cyclin-dependent kinase inhibitor 1C	-1253023882173
contig_15345	B5RI68	transposase-like	-2680000000000		contig_16348	A0A1S3KQK5	melanoma antigen recognized by T-cells 1	-1247227635977
contig_4193	A0A1S3NXV2	macrophage receptor MARCO-like isoform X1	-2580000000000		contig_72315	A0A1S3PAR9	ubiquitin carboxyl-terminal hydrolase 24 isoform X4	-1244990141487
contig_11488	A0A1S3M196	tumor necrosis factor alpha-induced protein 8-like protein 2	-2560000000000		contig_90499	A0A1S3SHP0	protein FAM180A-like	-122404265119
contig_19877	A0A1S3NPQ2	Tetraspanin	-1810000000000		contig_63300	A0A1S3P3B2	short-chain dehydrogenase/reductase 3-like	-1163991666012
contig_10244	A0A1S3P2B0	tumor necrosis factor receptor superfamily member 1B-like isoform X1	-1570000000000		contig_78848	A0A1S3RE10	teneurin-3-like isoform X11	-1102321481058
contig_25433	A0A1S3MRA1	Hexosyltransferase	-1290000000000		contig_113384	A0A1S3NHA7	homeobox protein MOX-1-like	-1098471026146
contig_10828	A0A1S3KKI3	apoptosis-inducing factor 3-like isoform X1	-1290000000000		contig_49870	A0A1S3KUK7	retinal dehydrogenase 2-like	-1096574368904
contig_38323	B5XE89	Tumor necrosis factor receptor superfamily member 11B	-957000000000		contig_100879	A0A1S3NKU3	LIM domain transcription factor LMO4.1-like	-1095501984419
contig_388	B5X4P7	Collagenase 3	-821000000000		contig_12878	A0A1S3PW66	keratin, type I cytoskeletal 13-like	-1085392406363
contig_33567	A0A1S3NZ22	interleukin-1 receptor type 1-like	-811000000000		contig_84708	B9EML5	Deoxyribonuclease gamma	-1079136496271
contig_9714	A0A1S3KV02	interferon regulatory factor 8-like isoform X4	-790000000000		contig_18330	A0A1S3KQC0	aryl hydrocarbon receptor nuclear translocator-like protein 1 isoform X4	-1066382517385
contig_22052	C0HA75	Transposable element Tcb2 transposase	-789000000000		contig_23279	A0A1S3NJT5	Nitric oxide synthase	-102399422268
contig_9928	C0HBH2	Transposable element Tcb1 transposase	-710000000000		contig_124129	B5RI57	Electron transfer flavoprotein subunit alpha, mitochondrial (Fragment)	-1016903879783
contig_30722	A0A1S3QQB9	pro-interleukin-16-like	-125000000000		contig_8008	A0A1S3LJ59	protein-glutamine gamma-glutamyltransferase 5-like	-976995886545
contig_15218	B5XC81	Tetraspanin-8	-29635040172		contig_9927	A0A1S3NRI0	Cathepsin K	-873463226307

## Sheet: Table S3
Table S3: KEGG Pathways of mRNA DEGs
Pathways Exclusive mRNA DEGs for salmon HK	Number genes involved		Pathways Exlusive mRNA DEGs for salmon SHK-1 cell line	Number genes involved		Pathways common mRNA DEGs for salmon SHK-1 cell line and salmon HK	Number genes involved
04151 PI3K-Akt signaling pathway	104		04151 PI3K-Akt signaling pathway	119		04151 PI3K-Akt signaling pathway	102
04144 Endocytosis	89		04010 MAPK signaling pathway	112		04010 MAPK signaling pathway	86
04141 Protein processing in endoplasmic reticulum	86		04144 Endocytosis	94		04144 Endocytosis	85
04010 MAPK signaling pathway	85		04810 Regulation of actin cytoskeleton	79		04810 Regulation of actin cytoskeleton	79
04142 Lysosome	68		04015 Rap1 signaling pathway	76		04510 Focal adhesion	77
04120 Ubiquitin mediated proteolysis	65		04014 Ras signaling pathway	72		04015 Rap1 signaling pathway	70
04110 Cell cycle	65		04510 Focal adhesion	72		04014 Ras signaling pathway	64
04210 Apoptosis	63		04020 Calcium signaling pathway	67		04141 Protein processing in endoplasmic reticulum	59
04810 Regulation of actin cytoskeleton	63		04060 Cytokine-cytokine receptor interaction	67		03010 Ribosome	57
04014 Ras signaling pathway	62		04360 Axon guidance	67		04024 cAMP signaling pathway	53
04218 Cellular senescence	62		04530 Tight junction	60		04020 Calcium signaling pathway	52
03040 Spliceosome	60		04621 NOD-like receptor signaling pathway	60		04530 Tight junction	51
04510 Focal adhesion	60		04062 Chemokine signaling pathway	60		04390 Hippo signaling pathway	50
04150 mTOR signaling pathway	59		04120 Ubiquitin mediated proteolysis	59		04022 cGMP-PKG signaling pathway	50
04015 Rap1 signaling pathway	58		04218 Cellular senescence	57		04060 Cytokine-cytokine receptor interaction	50
04140 Autophagy - animal	58		04630 JAK-STAT signaling pathway	56		04310 Wnt signaling pathway	49
04621 NOD-like receptor signaling pathway	57		04024 cAMP signaling pathway	56		04630 JAK-STAT signaling pathway	48
00190 Oxidative phosphorylation	56		04140 Autophagy - animal	55		04142 Lysosome	47
04217 Necroptosis	55		04910 Insulin signaling pathway	55		04514 Cell adhesion molecules	46
04530 Tight junction	54		04210 Apoptosis	54		04145 Phagosome	46
03013 Nucleocytoplasmic transport	51		04668 TNF signaling pathway	53		04550 Signaling pathways regulating pluripotency of stem cells	46
04062 Chemokine signaling pathway	51		04150 mTOR signaling pathway	53		04062 Chemokine signaling pathway	46
04310 Wnt signaling pathway	49		04022 cGMP-PKG signaling pathway	52		04071 Sphingolipid signaling pathway	45
04390 Hippo signaling pathway	47		04310 Wnt signaling pathway	51		04670 Leukocyte transendothelial migration	45
04630 JAK-STAT signaling pathway	47		04390 Hippo signaling pathway	51		04068 FoxO signaling pathway	44
04071 Sphingolipid signaling pathway	47		04064 NF-kappa B signaling pathway	51		04150 mTOR signaling pathway	44
04360 Axon guidance	47		04068 FoxO signaling pathway	51		04140 Autophagy - animal	44
04022 cGMP-PKG signaling pathway	46		04080 Neuroactive ligand-receptor interaction	50		04210 Apoptosis	42
04145 Phagosome	46		04659 Th17 cell differentiation	49		04910 Insulin signaling pathway	41
04068 FoxO signaling pathway	45		04217 Necroptosis	48		04072 Phospholipase D signaling pathway	40
04024 cAMP signaling pathway	45		04625 C-type lectin receptor signaling pathway	48		03040 Spliceosome	39
04020 Calcium signaling pathway	44		04660 T cell receptor signaling pathway	48		04120 Ubiquitin mediated proteolysis	39
04152 AMPK signaling pathway	43		04072 Phospholipase D signaling pathway	47		04520 Adherens junction	39
04060 Cytokine-cytokine receptor interaction	43		04722 Neurotrophin signaling pathway	47		04621 NOD-like receptor signaling pathway	39
04550 Signaling pathways regulating pluripotency of stem cells	42		04152 AMPK signaling pathway	46		04935 Growth hormone synthesis, secretion and action	39
03010 Ribosome	41		04141 Protein processing in endoplasmic reticulum	44		00190 Oxidative phosphorylation	38
04921 Oxytocin signaling pathway	41		04066 HIF-1 signaling pathway	44		03013 Nucleocytoplasmic transport	38
04146 Peroxisome	39		04110 Cell cycle	44		04080 Neuroactive ligand-receptor interaction	38
04910 Insulin signaling pathway	38		03040 Spliceosome	43		04110 Cell cycle	38
04722 Neurotrophin signaling pathway	38		04071 Sphingolipid signaling pathway	43		04217 Necroptosis	38
00230 Purine metabolism	37		04935 Growth hormone synthesis, secretion and action	43		04722 Neurotrophin signaling pathway	38
04668 TNF signaling pathway	37		03013 Nucleocytoplasmic transport	42		04152 AMPK signaling pathway	36
04072 Phospholipase D signaling pathway	37		04514 Cell adhesion molecules	42		04512 ECM-receptor interaction	36
04935 Growth hormone synthesis, secretion and action	37		04142 Lysosome	41		04912 GnRH signaling pathway	35
04261 Adrenergic signaling in cardiomyocytes	37		04620 Toll-like receptor signaling pathway	41		04070 Phosphatidylinositol signaling system	34
03015 mRNA surveillance pathway	36		04658 Th1 and Th2 cell differentiation	41		04625 C-type lectin receptor signaling pathway	34
03008 Ribosome biogenesis in eukaryotes	36		04550 Signaling pathways regulating pluripotency of stem cells	40		04066 HIF-1 signaling pathway	33
03050 Proteasome	36		04650 Natural killer cell mediated cytotoxicity	40		04660 T cell receptor signaling pathway	33
04066 HIF-1 signaling pathway	36		04520 Adherens junction	39		04666 Fc gamma R-mediated phagocytosis	33
04080 Neuroactive ligand-receptor interaction	36		04613 Neutrophil extracellular trap formation	39		04350 TGF-beta signaling pathway	32
04111 Cell cycle - yeast	36		04662 B cell receptor signaling pathway	39		04668 TNF signaling pathway	32
04670 Leukocyte transendothelial migration	36		04145 Phagosome	37		04613 Neutrophil extracellular trap formation	32
04064 NF-kappa B signaling pathway	35		04666 Fc gamma R-mediated phagocytosis	37		04728 Dopaminergic synapse	32
04137 Mitophagy - animal	35		04670 Leukocyte transendothelial migration	37		01521 EGFR tyrosine kinase inhibitor resistance	31
04625 C-type lectin receptor signaling pathway	35		04728 Dopaminergic synapse	37		04610 Complement and coagulation cascades	30
04922 Glucagon signaling pathway	35		01522 Endocrine resistance	37		04659 Th17 cell differentiation	29
04915 Estrogen signaling pathway	35		00230 Purine metabolism	36		00562 Inositol phosphate metabolism	28
04660 T cell receptor signaling pathway	34		04915 Estrogen signaling pathway	36		04640 Hematopoietic cell lineage	28
04659 Th17 cell differentiation	34		04070 Phosphatidylinositol signaling system	35		04650 Natural killer cell mediated cytotoxicity	28
04115 p53 signaling pathway	33		04211 Longevity regulating pathway	35		04922 Glucagon signaling pathway	28
04613 Neutrophil extracellular trap formation	33		04012 ErbB signaling pathway	34		04925 Aldosterone synthesis and secretion	28
03018 RNA degradation	32		04361 Axon regeneration	34		04974 Protein digestion and absorption	28
04514 Cell adhesion molecules	32		04917 Prolactin signaling pathway	33		00564 Glycerophospholipid metabolism	27
04666 Fc gamma R-mediated phagocytosis	32		01521 EGFR tyrosine kinase inhibitor resistance	33		03015 mRNA surveillance pathway	27
04728 Dopaminergic synapse	32		04657 IL-17 signaling pathway	32		04540 Gap junction	27
05235 PD-L1 expression and PD-1 checkpoint pathway in cancer	32		00562 Inositol phosphate metabolism	31		04658 Th1 and Th2 cell differentiation	27
04914 Progesterone-mediated oocyte maturation	31		04912 GnRH signaling pathway	31		04916 Melanogenesis	27
04916 Melanogenesis	31		04925 Aldosterone synthesis and secretion	31		04064 NF-kappa B signaling pathway	26
00510 N-Glycan biosynthesis	30		05223 Non-small cell lung cancer	31		04115 p53 signaling pathway	25
04070 Phosphatidylinositol signaling system	29		00310 Lysine degradation	30		00310 Lysine degradation	24
04725 Cholinergic synapse	29		04350 TGF-beta signaling pathway	30		04662 B cell receptor signaling pathway	24
04211 Longevity regulating pathway	29		04664 Fc epsilon RI signaling pathway	30		03018 RNA degradation	23
00310 Lysine degradation	28		04920 Adipocytokine signaling pathway	29		04012 ErbB signaling pathway	23
04013 MAPK signaling pathway - fly	28		04916 Melanogenesis	29		04664 Fc epsilon RI signaling pathway	23
04012 ErbB signaling pathway	28		04713 Circadian entrainment	29		04750 Inflammatory mediator regulation of TRP channels	23
04658 Th1 and Th2 cell differentiation	28		05230 Central carbon metabolism in cancer	29		04917 Prolactin signaling pathway	22
00564 Glycerophospholipid metabolism	27		05140 Leishmaniasis	29		04720 Long-term potentiation	22
04520 Adherens junction	27		05034 Alcoholism	29		00230 Purine metabolism	21
04650 Natural killer cell mediated cytotoxicity	27		05412 Arrhythmogenic right ventricular cardiomyopathy	29		00510 N-Glycan biosynthesis	21
04912 GnRH signaling pathway	27		00564 Glycerophospholipid metabolism	28		03008 Ribosome biogenesis in eukaryotes	21
01521 EGFR tyrosine kinase inhibitor resistance	27		03008 Ribosome biogenesis in eukaryotes	28		04137 Mitophagy - animal	21
00520 Amino sugar and nucleotide sugar metabolism	26		04540 Gap junction	28		04620 Toll-like receptor signaling pathway	21
00270 Cysteine and methionine metabolism	26		04922 Glucagon signaling pathway	28		04924 Renin secretion	21
04925 Aldosterone synthesis and secretion	26		04724 Glutamatergic synapse	28		04730 Long-term depression	21
04750 Inflammatory mediator regulation of TRP channels	26		04750 Inflammatory mediator regulation of TRP channels	28		04713 Circadian entrainment	21
00600 Sphingolipid metabolism	25		05211 Renal cell carcinoma	28		04340 Hedgehog signaling pathway	19
04350 TGF-beta signaling pathway	25		04512 ECM-receptor interaction	27		04370 VEGF signaling pathway	19
04662 B cell receptor signaling pathway	25		04622 RIG-I-like receptor signaling pathway	27		04146 Peroxisome	18
04920 Adipocytokine signaling pathway	25		03015 mRNA surveillance pathway	25		04929 GnRH secretion	18
04260 Cardiac muscle contraction	25		04115 p53 signaling pathway	25		04927 Cortisol synthesis and secretion	18
05410 Hypertrophic cardiomyopathy	25		04340 Hedgehog signaling pathway	23		00010 Glycolysis / Gluconeogenesis	17
00010 Glycolysis / Gluconeogenesis	24		04370 VEGF signaling pathway	23		00513 Various types of N-glycan biosynthesis	17
00280 Valine, leucine and isoleucine degradation	24		04927 Cortisol synthesis and secretion	23		04330 Notch signaling pathway	17
03030 DNA replication	24		04727 GABAergic synapse	23		04727 GABAergic synapse	17
04361 Axon regeneration	24		04061 Viral protein interaction with cytokine and cytokine receptor	21		03050 Proteasome	16
00562 Inositol phosphate metabolism	23		04640 Hematopoietic cell lineage	21		04923 Regulation of lipolysis in adipocytes	16
00480 Glutathione metabolism	23		04213 Longevity regulating pathway - multiple species	21		04920 Adipocytokine signaling pathway	16
03420 Nucleotide excision repair	23		04330 Notch signaling pathway	20		03320 PPAR signaling pathway	16
04610 Complement and coagulation cascades	23		04623 Cytosolic DNA-sensing pathway	20		04961 Endocrine and other factor-regulated calcium reabsorption	16
04620 Toll-like receptor signaling pathway	23		04911 Insulin secretion	20		00600 Sphingolipid metabolism	15
04917 Prolactin signaling pathway	23		03320 PPAR signaling pathway	20		04612 Antigen processing and presentation	15
04726 Serotonergic synapse	23		00010 Glycolysis / Gluconeogenesis	19		04657 IL-17 signaling pathway	15
04721 Synaptic vesicle cycle	23		00600 Sphingolipid metabolism	19		04061 Viral protein interaction with cytokine and cytokine receptor	14
04713 Circadian entrainment	22		04146 Peroxisome	19		04622 RIG-I-like receptor signaling pathway	14
00240 Pyrimidine metabolism	21		04624 Toll and Imd signaling pathway	19		00520 Amino sugar and nucleotide sugar metabolism	12
04540 Gap junction	21		04918 Thyroid hormone synthesis	19		00250 Alanine, aspartate and glutamate metabolism	12
04640 Hematopoietic cell lineage	21		04720 Long-term potentiation	19		00514 Other types of O-glycan biosynthesis	12
04622 RIG-I-like receptor signaling pathway	21		04730 Long-term depression	19		02010 ABC transporters	12
04657 IL-17 signaling pathway	21		04610 Complement and coagulation cascades	18		04216 Ferroptosis	12
03320 PPAR signaling pathway	21		04924 Renin secretion	18
00513 Various types of N-glycan biosynthesis	20		04979 Cholesterol metabolism	18
00970 Aminoacyl-tRNA biosynthesis	20		00240 Pyrimidine metabolism	17
00020 Citrate cycle TCA cycle	19		04923 Regulation of lipolysis in adipocytes	17
00620 Pyruvate metabolism	19		04929 GnRH secretion	17
00071 Fatty acid degradation	19		04978 Mineral absorption	17
03410 Base excision repair	19		00051 Fructose and mannose metabolism	16
03440 Homologous recombination	19		00561 Glycerolipid metabolism	16
04330 Notch signaling pathway	19		03018 RNA degradation	16
04370 VEGF signaling pathway	19		04216 Ferroptosis	16
04216 Ferroptosis	19		04974 Protein digestion and absorption	16
04612 Antigen processing and presentation	19		00030 Pentose phosphate pathway	15
00630 Glyoxylate and dicarboxylate metabolism	18		00380 Tryptophan metabolism	15
00561 Glycerolipid metabolism	18		04215 Apoptosis - multiple species	15
00250 Alanine, aspartate and glutamate metabolism	18		04962 Vasopressin-regulated water reabsorption	15
00260 Glycine, serine and threonine metabolism	18		04961 Endocrine and other factor-regulated calcium reabsorption	15
00330 Arginine and proline metabolism	18		04710 Circadian rhythm	15
00380 Tryptophan metabolism	18		00280 Valine, leucine and isoleucine degradation	14
04512 ECM-receptor interaction	18		00330 Arginine and proline metabolism	14
04924 Renin secretion	18		00480 Glutathione metabolism	14
04976 Bile secretion	18		00020 Citrate cycle TCA cycle	13
04720 Long-term potentiation	18		00520 Amino sugar and nucleotide sugar metabolism	13
04730 Long-term depression	18		00190 Oxidative phosphorylation	13
00640 Propanoate metabolism	17		03010 Ribosome	13
04340 Hedgehog signaling pathway	17		04721 Synaptic vesicle cycle	13
04391 Hippo signaling pathway - fly	17		00620 Pyruvate metabolism	12
04623 Cytosolic DNA-sensing pathway	17		00071 Fatty acid degradation	12
04929 GnRH secretion	17		00860 Porphyrin metabolism	12
04974 Protein digestion and absorption	17		00970 Aminoacyl-tRNA biosynthesis	12
04962 Vasopressin-regulated water reabsorption	17		03030 DNA replication	12
04961 Endocrine and other factor-regulated calcium reabsorption	17		03410 Base excision repair	12
04724 Glutamatergic synapse	17		03420 Nucleotide excision repair	12
05032 Morphine addiction	17		04011 MAPK signaling pathway - yeast	12
03020 RNA polymerase	16		04341 Hedgehog signaling pathway - fly	12
04927 Cortisol synthesis and secretion	16		04612 Antigen processing and presentation	12
00410 beta-Alanine metabolism	15
04664 Fc epsilon RI signaling pathway	15
00062 Fatty acid elongation	14
00350 Tyrosine metabolism	14
03060 Protein export	14
04624 Toll and Imd signaling pathway	14
04979 Cholesterol metabolism	14
04727 GABAergic synapse	14
05031 Amphetamine addiction	14
00830 Retinol metabolism	13
03022 Basal transcription factors	13
04130 SNARE interactions in vesicular transport	13
04923 Regulation of lipolysis in adipocytes	13
00051 Fructose and mannose metabolism	12
00052 Galactose metabolism	12
01040 Biosynthesis of unsaturated fatty acids	12
00511 Other glycan degradation	12
04710 Circadian rhythm	12
